# Supplementary material for: Maturation of three-dimensional, hiPSC-derived cardiomyocyte spheroids utilizing cyclic, uniaxial stretch and electrical stimulation
Source: PubMed Central journal article supplement (PMC6611624; doi:10.1371/journal.pone.0219442), 2019-07-05
Supplement: pone.0219442.s003.pdf [file pone.0219442.s003.pdf]

| Primary antibodies                       | Dilutions | Source        | Cell target               | Catalog # | Type              |
|------------------------------------------|-----------|---------------|---------------------------|-----------|-------------------|
| <b>Cardiac myocyte markers</b>           |           |               |                           |           |                   |
| Human Cardiac Troponin T (hcTnT)         | 1:200     | Abcam         | Human cardiomyocyte       | ab91605   | Rabbit monoclonal |
| Cardiac Troponin I (cTnI)                | 1:200     | Abcam         | Cardiomyocyte             | ab47003   | Rabbit polyclonal |
| Ventricular Myosin Light Chain 2 (MLC2v) | 1:100     | Abcam         | Ventricular cardiomyocyte | ab92721   | Rabbit monoclonal |
| Atrial Myosin Light Chain 2 (MLC2a)      | 1:100     | Abcam         | Atrial cardiomyocyte      | ab68086   | Mouse polyclonal  |
| Connexin 43 (CX43)                       | 1:100     | Abcam         | Cardiomyocyte             | ab11370   | Rabbit polyclonal |
| N-Cadherin (N-Cad)                       | 1:100     | Abcam         | Cardiomyocyte             | ab18203   | Rabbit polyclonal |
| Nkx 2.5                                  | 1:100     | Thermo Fisher | Cardiomyocyte             | PA5-47322 | Goat polyclonal   |

**S2 Table: Primary antibodies used in this study.** Antibodies used to characterize the hiPSC-cardiomyocyte spheroids before and after both stimulation regimens to analyze the change in expression of cardiomyocyte maturation proteins.
